# Supplementary material for: Liquid crystalline epoxy networks with exchangeable disulfide bonds
Source: Royal Society of Chemistry journal article supplement (doi:10.1039/c7sm00934h), 2017-01-01
Supplement: c7sm00934h1.pdf [file c7sm00934h1.pdf]

Supporting Information

**Liquid Crystalline Epoxy Networks with Exchangeable Disulfide Bonds**

Yuzhan Li<sup>a</sup>, Yuehong Zhang<sup>a</sup>, Orlando Rios<sup>b</sup>, Jong K. Keum<sup>c</sup>, and Michael R. Kessler<sup>a,\*</sup>

<sup>a</sup> School of Mechanical and Materials Engineering, Washington State University, Pullman, WA 99164, USA

<sup>b</sup> Deposition Sciences Group, Oak Ridge National Laboratory, Oak Ridge, TN 37831, USA

<sup>c</sup> Center for Nanophase Materials Sciences, Oak Ridge National Laboratory, Oak Ridge, TN 37831, USA

\* PO Box 642920, Pullman, WA, 99164-2920; Phone (509) 335-8654; Email: MichaelR.Kessler@wsu.edu

**List of supplementary figures and videos**

Figure S1 Synthesis route and reaction mechanism of LCEN.

Figure S2 Liquid crystalline properties of LCEN with different amount of DSA during curing.

Video S1 Thermally induced unfolding of LCEN

Video S2 Thermally induced re-assembling of LCEN

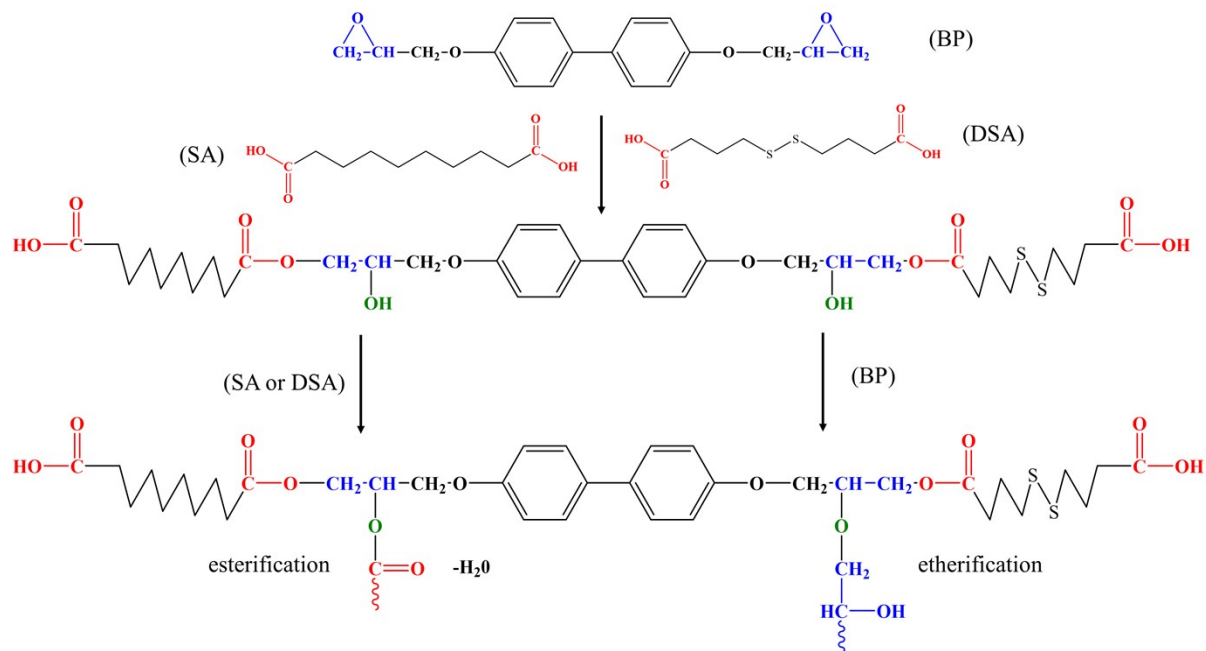

Figure S1. Synthesis route and reaction mechanism of LCEN.

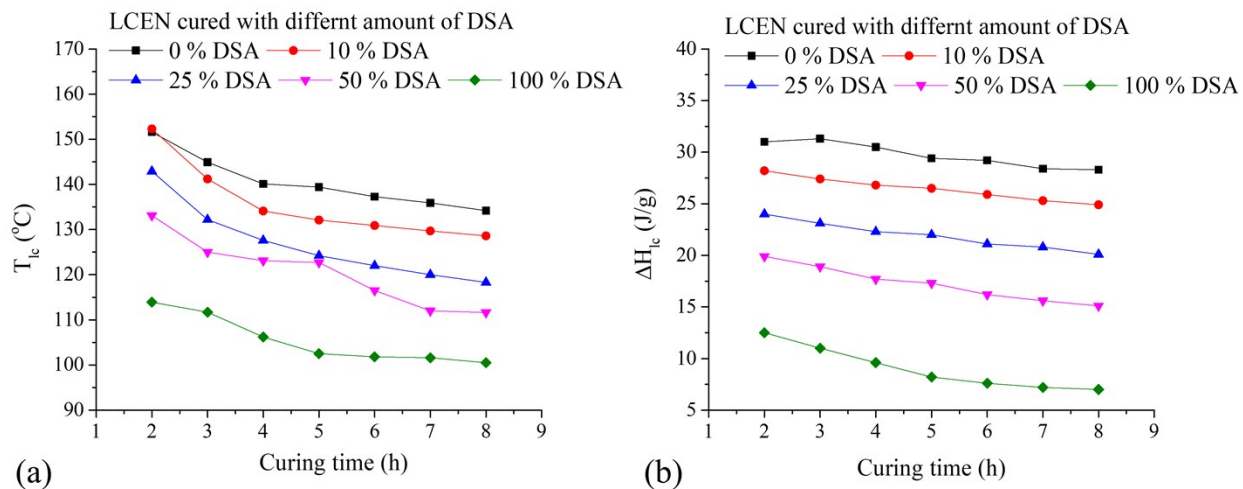

Figure S2. Evolution of LC transition temperature ( $T_{lc}$ ) and the related enthalpy ( $\Delta H_{lc}$ ) of LCENs cured with different amount of DSA.
